# Supplementary material for: California Autism Prevalence by County and Race/Ethnicity: Declining Trends Among Wealthy Whites
Source: J Autism Dev Disord. 2020 Mar 19;50(11):4011–21. doi: 10.1007/s10803-020-04460-0 (PMC7557477; doi:10.1007/s10803-020-04460-0)
Supplement: Supplementary file 2 — Supplementary file2 (XLSX 44 kb) [file 10803_2020_4460_MOESM2_ESM.xlsx]

## Sheet: All Races
County\Birth Year	1993	1994	1995	1996	1997	1998	1999	2000	2001	2002	2003	2004	2005	2006	2007	2008	2009	2010	2011	2012	2013		Estimated CDDS/NCES ASD prevalence in 2019 in % as a function of county and birth year
Alameda	0.438	0.423	0.529	0.601	0.59	0.585	0.672	0.691	0.853	0.853	0.837	0.906	0.948	1.104	1.025	1.21	1.327	1.479	1.491	1.666	1.596
Butte	0.473	NaN	0.494	0.406	1.159	0.64	1.033	1.538	1.148	1.272	1.204	1.174	1.584	1.789	1.882	1.585	1.628	2.485	2.485	2.056	2.399
Contra Costa	0.419	0.422	0.416	0.618	0.533	0.708	0.581	0.837	0.807	0.637	0.87	0.782	0.738	0.91	0.979	0.94	0.94	1.26	1.312	1.089	1.327
El Dorado	NaN	NaN	NaN	NaN	NaN	0.75	0.481	0.823	0.882	1.148	0.65	NaN	0.748	0.607	0.886	1.205	1.162	0.947	1.291	1.033	0.861
Fresno	0.194	0.114	0.24	0.28	0.313	0.346	0.383	0.469	0.313	0.354	0.449	0.492	0.495	0.489	0.568	0.819	0.717	1.011	1.126	1.196	1.158
Humboldt	1.097	NaN	NaN	NaN	NaN	0.821	1.638	1.304	1.409	1.215	1.317	1.268	1.781	1.599	1.77	1.698	1.698	1.97	2.65	3.261	3.601
Imperial	NaN	NaN	NaN	NaN	0.385	0.358	0.343	0.61	0.599	0.412	0.828	0.764	1.024	1.115	1.65	2.202	2.415	2.415	3.267	2.947	2.912
Kern	0.39	0.279	0.42	0.422	0.588	0.563	0.56	0.612	0.805	0.624	0.883	0.81	0.722	0.766	0.898	0.965	0.952	0.985	1.203	1.157	1.309
Kings	NaN	NaN	NaN	NaN	NaN	NaN	NaN	0.582	NaN	NaN	0.656	0.7	NaN	0.835	0.612	0.682	1	0.773	1	1.272	1.454
Los Angeles	0.636	0.572	0.67	0.68	0.838	0.892	0.909	1.091	1.151	1.166	1.27	1.398	1.348	1.404	1.575	1.614	1.725	1.825	1.848	1.894	1.969
Madera	NaN	NaN	NaN	NaN	NaN	0.52	NaN	NaN	NaN	NaN	NaN	NaN	NaN	NaN	NaN	NaN	0.516	0.477	0.437	0.755	0.596
Marin	NaN	NaN	NaN	NaN	NaN	NaN	NaN	NaN	NaN	NaN	NaN	NaN	NaN	NaN	NaN	NaN	NaN	NaN	NaN	NaN	NaN
Merced	0.237	NaN	NaN	0.272	0.252	0.419	NaN	0.37	0.484	0.582	0.543	0.474	0.576	0.749	0.522	0.6	0.853	0.83	1.199	1.268	0.876
Monterey	0.409	0.287	0.424	0.446	0.641	0.398	0.417	0.58	0.598	0.51	0.531	0.511	0.548	0.662	0.619	0.728	0.776	0.903	0.776	0.744	0.982
Napa	NaN	NaN	NaN	NaN	NaN	NaN	0.659	NaN	1.053	NaN	0.642	1.206	0.738	0.774	1.366	NaN	0.908	NaN	1.327	NaN	1.117
Orange	0.385	0.425	0.527	0.481	0.574	0.542	0.647	0.562	0.571	0.631	0.701	0.717	0.773	0.793	0.82	0.866	0.943	0.902	0.849	0.918	0.775
Placer	0.271	0.316	0.3	0.312	0.548	0.579	0.658	0.771	0.696	0.855	0.833	0.852	1.063	1.046	0.967	1.284	1.4	1.361	1.459	1.575	1.595
Riverside	0.233	0.291	0.307	0.324	0.371	0.369	0.538	0.547	0.562	0.527	0.572	0.628	0.684	0.733	0.666	0.845	0.784	0.906	0.989	1.163	1.096
Sacramento	0.332	0.44	0.561	0.555	0.597	0.822	0.722	0.888	0.952	0.896	1.089	1.033	1.112	1.095	1.179	1.342	1.598	1.518	1.587	1.924	1.903
San Bernardino	0.184	0.283	0.308	0.449	0.392	0.41	0.462	0.575	0.575	0.624	0.679	0.711	0.616	0.741	0.813	0.761	0.873	0.961	0.896	0.971	0.991
San Diego	0.32	0.399	0.388	0.437	0.503	0.519	0.655	0.759	0.726	0.816	0.781	0.935	0.978	0.927	1.101	1.178	1.189	1.457	1.443	1.692	1.817
San Francisco	NaN	0.298	0.304	0.492	0.378	0.364	0.625	0.424	0.685	0.578	0.462	0.697	0.765	0.629	0.764	0.485	0.739	0.762	0.831	1.062	0.947
San Joaquin	0.203	0.336	0.348	0.381	0.507	0.469	0.521	0.522	0.775	0.687	0.595	0.714	0.798	0.843	0.983	1.153	1.419	1.614	1.64	2.057	2.101
San Luis Obispo	NaN	0.71	0.668	0.548	0.565	0.465	0.725	0.643	1.163	0.78	0.87	1.233	1.249	1.365	1.266	1.312	1.073	1.391	1.351	1.351	0.994
San Mateo	0.287	0.368	0.362	0.247	0.371	0.522	0.439	0.423	0.62	0.588	0.563	0.551	0.416	0.358	0.516	0.439	0.368	0.595	0.75	0.637	0.581
Santa Barbara	NaN	NaN	0.397	0.361	0.628	0.535	0.471	0.476	0.56	0.606	0.706	1.006	0.757	0.797	0.806	0.906	0.98	1.183	1.276	1.294	1.405
Santa Clara	0.397	0.41	0.471	0.598	0.668	0.66	0.722	0.87	0.898	0.865	0.913	0.797	0.791	0.811	0.893	0.938	0.87	0.991	0.986	1.02	0.972
Santa Cruz	0.414	0.44	NaN	NaN	NaN	0.404	0.512	0.701	0.542	0.405	0.436	0.468	0.536	0.657	0.793	0.676	0.541	0.541	0.676	0.541	0.643
Shasta	0.624	0.512	0.457	0.483	0.959	0.991	0.746	1.09	1.254	1.097	1.307	1.456	1.525	1.123	1.21	1.329	1.526	2.609	1.674	2.609	1.822
Solano	0.396	0.412	0.675	0.521	0.569	0.682	0.712	0.644	0.847	0.796	0.823	0.873	0.643	0.749	0.738	0.834	1.022	0.793	1.001	1.168	1.397
Sonoma	0.41	0.497	0.309	0.591	0.422	0.635	0.69	0.769	0.646	0.774	0.889	0.705	0.872	0.804	0.757	0.714	0.635	0.813	0.873	0.813	1.051
Stanislaus	0.233	0.318	0.25	0.239	0.415	0.466	0.539	0.46	0.75	0.823	0.576	0.657	0.911	0.947	0.883	0.86	0.79	0.952	1.127	1.243	1.684
Sutter	NaN	NaN	NaN	NaN	NaN	NaN	NaN	0.742	NaN	NaN	NaN	NaN	0.732	NaN	NaN	NaN	0.625	1.042	0.99	NaN	1.042
Tulare	0.274	0.214	0.28	0.372	0.239	0.253	0.381	0.39	0.33	0.452	0.584	0.41	0.558	0.658	0.719	0.702	0.714	0.79	0.89	1.141	1.178
Ventura	0.349	0.405	0.338	0.373	0.391	0.486	0.467	0.581	0.635	0.71	0.783	0.735	0.738	0.609	0.879	1.118	0.995	1.222	1.071	1.241	1.459
Yolo	NaN	NaN	0.48	0.712	0.819	NaN	NaN	0.707	0.631	1.142	0.966	1.254	1.103	0.901	0.894	1.046	1.465	1.381	1.465	1.632	1.465
Alameda/Santa Clara	0.415	0.416	0.497	0.6	0.632	0.626	0.7	0.789	0.878	0.86	0.879	0.846	0.863	0.945	0.954	1.061	1.077	1.213	1.215	1.313	1.255
Sierra Foothills	NaN	NaN	NaN	NaN	NaN	NaN	NaN	0.933	NaN	NaN	NaN	NaN	1.049	NaN	NaN	NaN	1.272	1.451	1.553	NaN	1.519		Butte, El Dorado, Placer and Sutter
South Central Valley	NaN	NaN	NaN	NaN	NaN	NaN	NaN	NaN	NaN	NaN	NaN	NaN	NaN	NaN	NaN	NaN	0.801	0.918	1.063	1.151	1.197		Fresno, Kern, Kings, Madera and Tulare
Los Angeles/Ventura	0.605	0.556	0.634	0.648	0.791	0.849	0.864	1.039	1.101	1.121	1.222	1.332	1.289	1.327	1.512	1.571	1.661	1.772	1.78	1.837	1.924
N San Joaquin Valley	0.22	NaN	NaN	0.311	0.427	0.459	NaN	0.473	0.711	0.714	0.578	0.65	0.798	0.862	0.863	0.949	1.094	1.238	1.379	1.626	1.734		Merced, San Joaquin and Stanislaus
Monterey to SF coast	NaN	0.34	NaN	NaN	NaN	0.433	0.493	0.504	0.616	0.535	0.51	0.554	0.543	0.55	0.64	0.571	0.595	0.716	0.765	0.745	0.789		Monterey, Santa Cruz, San Mateo and San Francisco
Delta Northeast	NaN	NaN	NaN	NaN	NaN	NaN	NaN	NaN	0.829	NaN	0.828	1.034	0.784	0.795	0.884	NaN	1.126	NaN	1.184	NaN	1.37		Napa, Solano and Yolo
San Diego/Imperial	NaN	NaN	NaN	NaN	0.495	0.508	0.632	0.749	0.716	0.786	0.784	0.923	0.982	0.94	1.138	1.25	1.275	1.525	1.572	1.781	1.894
South Central Coast	NaN	NaN	0.504	0.433	0.603	0.509	0.563	0.536	0.779	0.667	0.763	1.084	0.922	0.98	0.961	1.035	1.009	1.249	1.3	1.312	1.274		Santa Barbara and San Luis Obispo
Sonoma/Marin	NaN	NaN	NaN	NaN	NaN	NaN	NaN	NaN	NaN	NaN	NaN	NaN	NaN	NaN	NaN	NaN	NaN	NaN	NaN	NaN	NaN

## Sheet: Whites
County\Birth Year	1993	1994	1995	1996	1997	1998	1999	2000	2001	2002	2003	2004	2005	2006	2007	2008	2009	2010	2011	2012	2013		Estimated CDDS/NCES ASD prevalence in 2019 in % as a function of county and birth year
Alameda	0.475	0.695	0.823	0.794	0.82	0.78	0.63	0.738	1.062	0.892	1.146	0.654	0.916	0.859	0.983	1.381	0.992	1.523	0.779	1.275	1.062
Butte	NaN	NaN	NaN	NaN	NaN	NaN	NaN	NaN	NaN	NaN	NaN	NaN	NaN	NaN	NaN	NaN	NaN	3.2	NaN	NaN	NaN
Contra Costa	0.478	0.628	0.582	0.709	0.714	0.986	0.738	0.983	0.942	0.815	0.844	0.816	0.64	0.922	0.869	0.692	0.798	0.905	1.091	0.931	1.171
El Dorado	NaN	NaN	NaN	NaN	NaN	0.796	NaN	1.061	1.035	1.211	0.776	NaN	0.834	NaN	0.87	1.289	1.154	1.222	1.357	1.154	1.086
Fresno	0.45	NaN	0.399	0.492	0.759	0.697	0.522	0.874	0.459	0.705	0.753	0.944	0.484	0.588	0.745	1.199	1.16	1.47	1.315	1.044	0.812
Humboldt	NaN	NaN	NaN	NaN	NaN	NaN	2.059	1.744	1.984	1.698	1.409	1.539	2.343	2.063	1.768	2.399	1.642	2.652	4.041	3.157	4.041
Imperial	0	0	0.582	0.688	0.702	1.153	0	0.731	0	0.631	1.863	0.775	1.468	1.515	0	1.758	3.515	0.879	3.515	3.515	2.637
Kern	0.954	0.413	0.804	0.838	1.076	1.078	0.973	1.156	1.095	0.841	1.176	1.012	0.717	0.89	0.867	1.23	1.17	1.53	1.56	1.11	1.35
Kings	NaN	NaN	NaN	0	NaN	NaN	NaN	NaN	NaN	NaN	NaN	NaN	NaN	NaN	NaN	NaN	NaN	NaN	NaN	NaN	NaN
Los Angeles	1.027	1.226	1.144	1.248	1.503	1.617	1.448	1.776	1.784	2.024	1.975	2.157	1.917	1.972	2.154	1.963	1.969	2.099	2.144	2.345	2.099
Madera	NaN	NaN	NaN	0.492	NaN	NaN	NaN	NaN	NaN	NaN	NaN	NaN	NaN	NaN	NaN	NaN	NaN	NaN	NaN	NaN	NaN
Marin	0.266	0.438	0.317	0.32	0.162	0.315	0.518	0.282	0.136	0.132	0.397	0.316	0.205	0.255	0.134	0.197	0.132	0.066	0.197	0.066	0
Merced	NaN	0.106	0.126	NaN	0.539	0.519	0.655	0.424	1.393	0.986	0.833	1.366	1.287	1.414	1.067	1.464	2.115	1.464	1.464	2.278	1.79
Monterey	NaN	NaN	NaN	NaN	1.55	NaN	NaN	NaN	1.433	NaN	NaN	NaN	NaN	NaN	NaN	NaN	NaN	NaN	NaN	NaN	NaN
Napa	NaN	NaN	NaN	NaN	NaN	NaN	NaN	NaN	NaN	0.382	NaN	0.856	1.48	NaN	NaN	NaN	0.75	NaN	NaN	NaN	NaN
Orange	0.586	0.653	0.535	0.595	0.679	0.63	0.759	0.624	0.658	0.72	0.81	0.727	0.804	0.831	0.695	0.629	0.708	0.823	0.606	0.731	0.514
Placer	0.311	0.391	0.364	0.405	0.562	0.573	0.874	0.859	0.759	0.941	0.768	0.99	1.23	1.041	0.809	1.371	1.208	1.273	1.371	1.306	1.632
Riverside	0.389	0.57	0.499	0.488	0.539	0.524	0.83	0.804	0.793	0.841	0.855	0.808	1.066	1.011	1.028	1.062	1.062	1.234	1.219	1.562	1.406
Sacramento	0.605	0.686	0.863	0.903	0.91	1.16	1.132	1.333	1.301	1.184	1.642	1.357	1.352	1.334	1.276	1.421	1.894	1.676	1.53	1.913	1.84
San Bernardino	0.392	0.641	0.473	0.749	0.527	0.512	0.561	0.853	0.886	0.888	0.848	0.945	0.727	1.202	1.117	1.093	1.169	1.245	1.321	0.788	0.813
San Diego	0.477	0.637	0.534	0.585	0.746	0.704	0.876	0.91	0.96	0.936	0.879	0.965	0.925	1.054	1.095	0.974	1.084	1.195	1.167	1.351	1.204
San Francisco	NaN	NaN	NaN	NaN	NaN	NaN	NaN	NaN	NaN	NaN	NaN	NaN	NaN	NaN	NaN	NaN	NaN	NaN	NaN	NaN	NaN
San Joaquin	0.629	0.546	0.545	0.797	0.708	0.509	0.603	0.981	1.194	1.381	0.627	1.399	1.067	0.888	1.405	1.914	2.02	1.967	2.126	2.498	2.498
San Luis Obispo	NaN	0.929	1.047	0.708	0.858	NaN	1.089	0.882	1.643	1.057	1.012	1.807	1.614	1.681	1.444	1.369	1.53	2.094	1.047	1.289	1.047
San Mateo	NaN	NaN	NaN	NaN	NaN	0.726	NaN	NaN	0.669	0.624	NaN	NaN	NaN	NaN	NaN	0.539	NaN	NaN	0.588	0.539	NaN
Santa Barbara	NaN	NaN	NaN	0.895	1.147	1.107	0.812	1.27	1.432	NaN	NaN	1.775	0.928	1.275	1.266	1.441	1.041	1.602	1.522	1.602	1.602
Santa Clara	0.639	0.729	0.718	0.875	0.928	1.006	1.087	1.195	1.08	0.937	1.039	0.703	1.066	0.711	0.604	0.93	0.478	0.824	0.691	0.638	0.558
Santa Cruz	NaN	NaN	NaN	NaN	NaN	NaN	NaN	NaN	NaN	NaN	NaN	1.012	1.09	0.943	0.976	NaN	NaN	NaN	NaN	NaN	NaN
Shasta	0.721	0.536	NaN	NaN	1.158	1.14	0.826	1.398	1.528	1.112	1.449	1.783	1.841	1.388	1.755	1.935	1.712	3.275	2.233	3.573	2.382
Solano	NaN	NaN	1.339	NaN	NaN	0.935	NaN	NaN	1.156	0.847	1.093	1.268	0.895	NaN	NaN	NaN	1.081	NaN	NaN	NaN	NaN
Sonoma	0.437	0.852	0.469	0.942	0.624	0.886	0.951	1.089	1.091	0.912	1.309	0.894	1.292	1.122	0.969	0.755	0.604	0.856	0.755	0.805	0.906
Stanislaus	NaN	0.581	0.532	NaN	0.598	0.742	0.782	0.904	0.933	1.024	1.081	0.821	1.2	1.254	1.294	1.348	1.162	1.302	1.209	1.116	1.581
Sutter	NaN	NaN	NaN	NaN	NaN	NaN	NaN	NaN	NaN	NaN	NaN	NaN	NaN	NaN	NaN	NaN	NaN	1.48	NaN	NaN	NaN
Tulare	NaN	NaN	NaN	0.992	NaN	NaN	NaN	1.116	0.817	NaN	1.265	NaN	0.909	1.375	1.204	1.365	NaN	1.463	1.561	1.756	1.463
Ventura	0.531	0.566	0.634	0.487	0.522	0.616	0.803	0.766	0.925	1.038	1.128	0.883	1.356	0.83	1.121	1.999	1.379	1.448	1.551	1.723	1.62
Yolo	NaN	NaN	NaN	NaN	NaN	NaN	NaN	1.278	NaN	1.506	NaN	1.813	1.527	NaN	1.398	1.62	1.745	1.496	NaN	NaN	1.496
Alameda/Santa Clara	0.559	0.713	0.765	0.838	0.879	0.906	0.883	0.993	1.072	0.917	1.085	0.682	1.001	0.774	0.765	1.123	0.698	1.123	0.729	0.911	0.774
Sierra Foothills	0.389	0.329	0.421	0.413	0.63	0.705	0.91	1.161	0.921	1.085	0.9	0.959	1.145	1.078	1.036	1.411	1.259	1.668	1.699	1.441	1.699		Butte, El Dorado, Placer and Sutter
South Central Valley	0.596	0.346	0.533	0.666	0.746	0.741	0.721	0.954	0.782	0.685	0.932	0.898	0.653	0.85	0.889	1.19	1.203	1.407	1.458	1.19	1.19		Fresno, Kern, Kings, Madera and Tulare
Los Angeles/Ventura	0.916	1.075	1.02	1.067	1.273	1.377	1.302	1.553	1.6	1.808	1.806	1.902	1.812	1.767	1.984	1.968	1.876	1.996	2.05	2.247	2.023
N San Joaquin Valley	0.469	0.49	0.48	0.468	0.637	0.609	0.689	0.874	1.111	1.176	0.85	1.141	1.157	1.119	1.309	1.592	1.635	1.592	1.614	1.829	1.98		Merced, San Joaquin and Stanislaus
Monterey to SF coast	0.756	0.585	0.684	0.558	0.687	0.797	0.853	0.762	0.884	0.724	0.537	0.607	0.658	0.647	0.796	0.508	0.552	0.464	0.729	0.597	0.442		Monterey, Santa Cruz, San Mateo and San Francisco
Delta Northeast	0.605	0.575	1.154	0.93	0.869	0.844	0.623	0.943	1.113	0.955	0.948	1.369	1.206	0.897	0.971	1.081	1.254	0.822	0.822	0.995	0.908		Napa, Solano and Yolo
San Diego/Imperial	0.47	0.628	0.535	0.586	0.746	0.71	0.864	0.908	0.948	0.931	0.893	0.963	0.932	1.059	1.084	0.982	1.11	1.191	1.191	1.373	1.219
South Central Coast	NaN	0.634	0.782	0.787	0.982	0.826	0.96	1.065	1.547	0.953	0.904	1.792	1.302	1.483	1.362	1.406	1.285	1.847	1.285	1.446	1.325		Santa Barbara and San Luis Obispo
Sonoma/Marin	0.384	0.725	0.419	0.731	0.467	0.687	0.791	0.781	0.718	0.602	0.947	0.655	0.863	0.763	0.629	0.513	0.399	0.513	0.513	0.485	0.513

## Sheet: Blacks
County\Birth Year	1993	1994	1995	1996	1997	1998	1999	2000	2001	2002	2003	2004	2005	2006	2007	2008	2009	2010	2011	2012	2013		Estimated CDDS/NCES ASD prevalence in 2019 in % as a function of county and birth year
Alameda	NaN	NaN	NaN	NaN	0.671	NaN	0.654	0.671	1.489	1.089	1.041	1.311	0.99	1.282	1.16	1.267	1.387	1.267	1.93	2.111	1.81
Butte	0	0	NaN	0	0	0	NaN	0	NaN	NaN	NaN	0	NaN	NaN	NaN	0	NaN	0	0	0	NaN
Contra Costa	NaN	NaN	NaN	0.646	NaN	0.747	NaN	1.121	0.899	NaN	NaN	1.015	1.159	1.578	1.876	1.721	0.996	2.083	1.993	1.721	1.63
El Dorado	0	0	0	0	0	0	0	0	0	0	0	0	0	0	0	0	NaN	0	0	NaN	0
Fresno	NaN	NaN	NaN	NaN	NaN	NaN	NaN	NaN	NaN	NaN	NaN	NaN	NaN	NaN	NaN	1.66	NaN	1.937	NaN	1.799	1.799
Humboldt	0	NaN	0	NaN	0	0	NaN	0	0	0	NaN	0	NaN	0	0	NaN	0	NaN	0	0	0
Imperial	0	0	0	0	0	0	0	0	0	NaN	0	0	0	0	0	0	0	0	0	NaN	0
Kern	NaN	NaN	NaN	NaN	NaN	NaN	NaN	NaN	NaN	NaN	NaN	NaN	NaN	NaN	NaN	NaN	NaN	NaN	NaN	NaN	NaN
Kings	0	0	0	0	0	0	NaN	NaN	0	0	0	NaN	NaN	0	NaN	0	NaN	0	NaN	NaN	NaN
Los Angeles	0.811	0.529	0.798	0.781	1.104	1.111	1.238	1.412	1.554	1.404	1.34	1.123	1.506	1.339	1.839	1.707	1.878	2.025	1.622	1.915	2.049
Madera	NaN	NaN	NaN	NaN	NaN	NaN	NaN	NaN	NaN	NaN	NaN	NaN	NaN	NaN	NaN	NaN	NaN	NaN	NaN	NaN	NaN
Marin	NaN	NaN	NaN	NaN	NaN	NaN	NaN	NaN	NaN	NaN	NaN	NaN	NaN	NaN	NaN	NaN	NaN	NaN	NaN	NaN	NaN
Merced	NaN	0	NaN	NaN	NaN	NaN	0	0	0	0	0	0	0	NaN	NaN	NaN	0	0	0	0	NaN
Monterey	NaN	0	NaN	NaN	NaN	NaN	0	NaN	NaN	0	0	0	NaN	0	0	0	0	NaN	NaN	NaN	NaN
Napa	NaN	NaN	NaN	NaN	NaN	NaN	NaN	NaN	NaN	NaN	NaN	NaN	NaN	NaN	NaN	NaN	0	NaN	NaN	NaN	NaN
Orange	NaN	NaN	NaN	NaN	NaN	NaN	NaN	NaN	NaN	NaN	NaN	NaN	NaN	NaN	NaN	NaN	NaN	NaN	NaN	NaN	NaN
Placer	NaN	NaN	NaN	0	NaN	NaN	NaN	NaN	0	0	NaN	NaN	NaN	NaN	NaN	NaN	NaN	0	NaN	NaN	NaN
Riverside	0.329	0.453	0.319	0.373	NaN	0.439	0.685	0.603	0.773	0.683	0.634	0.69	0.975	0.892	0.704	1.256	0.994	1.256	1.361	1.465	1.099
Sacramento	NaN	NaN	0.428	NaN	0.577	0.538	NaN	0.472	1.226	1.048	1.118	1.186	1.159	1.636	1.077	2	1.707	1.902	1.902	2.146	2.292
San Bernardino	NaN	0.596	0.595	0.492	0.376	0.433	0.716	0.76	0.775	0.546	0.843	0.873	1.012	1.076	1.44	0.752	1.415	1.371	0.973	1.106	0.84
San Diego	0.442	NaN	0.526	NaN	NaN	0.763	0.673	1.202	0.85	1.136	1.023	1.263	1.085	1.263	1.35	1.434	1.558	1.371	1.558	1.745	2.618
San Francisco	NaN	NaN	NaN	0	NaN	NaN	NaN	NaN	NaN	NaN	NaN	NaN	NaN	NaN	NaN	NaN	0	NaN	NaN	NaN	NaN
San Joaquin	0	NaN	NaN	NaN	NaN	NaN	NaN	NaN	NaN	1.193	NaN	NaN	NaN	1.331	NaN	1.798	1.798	1.918	2.158	2.877	1.678
San Luis Obispo	0	0	0	0	0	0	0	0	0	0	0	0	0	NaN	0	0	0	0	0	0	0
San Mateo	NaN	NaN	0	NaN	0	NaN	0	0	NaN	NaN	NaN	NaN	NaN	0	NaN	NaN	0	0	NaN	0	NaN
Santa Barbara	0	0	0	0	NaN	NaN	0	0	0	0	0	0	0	NaN	NaN	0	NaN	NaN	NaN	NaN	0
Santa Clara	NaN	NaN	NaN	NaN	NaN	NaN	NaN	NaN	NaN	NaN	NaN	NaN	NaN	NaN	NaN	NaN	NaN	NaN	NaN	NaN	NaN
Santa Cruz	0	NaN	0	NaN	0	0	0	0	0	0	0	0	0	0	0	0	0	NaN	0	0	0
Shasta	NaN	0	0	NaN	0	0	NaN	0	NaN	0	NaN	NaN	0	0	0	0	0	NaN	NaN	0	0
Solano	NaN	NaN	NaN	NaN	NaN	NaN	NaN	0	NaN	NaN	NaN	NaN	NaN	NaN	NaN	NaN	2.05	NaN	NaN	NaN	NaN
Sonoma	0	0	0	0	0	NaN	NaN	0	0	0	NaN	0	NaN	0	0	0	0	0	NaN	NaN	NaN
Stanislaus	NaN	NaN	0	NaN	NaN	NaN	0	NaN	NaN	NaN	NaN	NaN	0	NaN	NaN	NaN	NaN	NaN	NaN	NaN	NaN
Sutter	0	0	0	NaN	0	0	0	0	NaN	0	0	0	0	0	NaN	0	0	NaN	NaN	0	0
Tulare	NaN	0	0	0	0	NaN	0	NaN	0	NaN	NaN	0	NaN	NaN	NaN	NaN	NaN	0	NaN	NaN	NaN
Ventura	NaN	NaN	NaN	NaN	NaN	NaN	NaN	NaN	NaN	NaN	NaN	NaN	NaN	0	NaN	NaN	NaN	NaN	NaN	NaN	NaN
Yolo	0	0	0	0	NaN	0	0	0	NaN	0	NaN	NaN	0	0	0	NaN	0	0	NaN	NaN	NaN
Alameda/Santa Clara	0.508	NaN	NaN	0.476	0.735	0.533	0.694	0.945	1.419	1.117	1.091	1.111	0.852	1.258	1.06	1.447	1.347	1.347	1.796	1.996	1.697
Sierra Foothills	NaN	NaN	NaN	NaN	NaN	NaN	NaN	NaN	NaN	NaN	NaN	NaN	NaN	NaN	NaN	NaN	NaN	NaN	NaN	NaN	NaN		Butte, El Dorado, Placer and Sutter
South Central Valley	NaN	NaN	NaN	NaN	NaN	0.76	0.625	1.093	0.733	0.718	1.011	NaN	0.939	0.979	1.147	1.162	0.871	1.22	1.162	1.394	1.626		Fresno, Kern, Kings, Madera and Tulare
Los Angeles/Ventura	0.804	0.548	0.778	0.756	1.056	1.077	1.181	1.365	1.53	1.355	1.33	1.09	1.466	1.294	1.806	1.673	1.863	2.017	1.602	1.875	2.041
N San Joaquin Valley	NaN	NaN	NaN	NaN	NaN	NaN	NaN	NaN	NaN	1.073	NaN	0.839	NaN	1.432	1.005	1.758	1.758	1.674	1.758	2.26	1.591		Merced, San Joaquin and Stanislaus
Monterey to SF coast	NaN	NaN	NaN	NaN	NaN	NaN	NaN	NaN	NaN	NaN	NaN	NaN	NaN	NaN	NaN	NaN	NaN	NaN	NaN	NaN	NaN		Monterey, Santa Cruz, San Mateo and San Francisco
Delta Northeast	NaN	NaN	NaN	NaN	NaN	NaN	NaN	NaN	NaN	NaN	NaN	NaN	NaN	NaN	NaN	NaN	1.792	NaN	NaN	NaN	NaN		Napa, Solano and Yolo
San Diego/Imperial	0.436	NaN	0.522	NaN	NaN	0.755	0.669	1.195	0.833	1.191	1.01	1.252	1.072	1.249	1.332	1.411	1.533	1.349	1.533	1.779	2.576
South Central Coast	NaN	NaN	NaN	NaN	NaN	NaN	NaN	NaN	NaN	NaN	NaN	NaN	NaN	NaN	NaN	NaN	NaN	NaN	NaN	NaN	NaN		Santa Barbara and San Luis Obispo
Sonoma/Marin	NaN	NaN	NaN	NaN	NaN	NaN	NaN	NaN	NaN	NaN	NaN	NaN	NaN	NaN	NaN	NaN	NaN	NaN	NaN	NaN	NaN

## Sheet: Hispanics
County\Birth Year	1993	1994	1995	1996	1997	1998	1999	2000	2001	2002	2003	2004	2005	2006	2007	2008	2009	2010	2011	2012	2013		Estimated CDDS/NCES ASD prevalence in 2019 in % as a function of county and birth year
Alameda	NaN	0.261	0.281	0.424	0.352	0.344	0.413	0.392	0.54	0.329	0.432	0.743	0.618	0.785	0.745	0.99	1.058	1.024	1.229	1.349	1.11
Butte	NaN	0	0	NaN	NaN	NaN	NaN	NaN	NaN	NaN	NaN	NaN	NaN	NaN	NaN	NaN	NaN	2.05	NaN	NaN	NaN
Contra Costa	NaN	NaN	NaN	0.346	NaN	0.313	0.428	0.433	0.529	0.286	0.648	0.475	0.444	0.617	0.687	0.854	0.651	0.814	0.875	0.773	1.058
El Dorado	0	0	NaN	0	0	NaN	0	NaN	0	NaN	0	0	NaN	NaN	NaN	NaN	NaN	NaN	NaN	NaN	NaN
Fresno	NaN	NaN	0.172	0.187	0.144	0.241	0.28	0.289	0.255	0.175	0.361	0.289	0.363	0.373	0.517	0.636	0.443	0.752	0.945	0.945	0.916
Humboldt	NaN	0	0	0	NaN	NaN	NaN	NaN	NaN	NaN	NaN	NaN	NaN	NaN	NaN	NaN	NaN	NaN	NaN	NaN	NaN
Imperial	NaN	NaN	NaN	NaN	0.395	NaN	NaN	0.547	0.516	NaN	0.732	0.749	0.894	1.021	1.622	2.106	2.221	2.374	3.063	2.642	2.565
Kern	0.157	0.203	0.283	0.231	0.31	0.304	0.342	0.371	0.672	0.423	0.592	0.691	0.612	0.582	0.762	0.768	0.699	0.659	0.918	1.018	1.128
Kings	NaN	NaN	NaN	NaN	NaN	NaN	NaN	NaN	0	NaN	0.72	NaN	NaN	0.782	NaN	NaN	NaN	0.682	NaN	0.806	0.93
Los Angeles	0.455	0.375	0.488	0.471	0.623	0.635	0.685	0.816	0.883	0.853	1.02	1.209	1.136	1.208	1.324	1.419	1.5	1.564	1.581	1.534	1.631
Madera	NaN	NaN	NaN	NaN	NaN	NaN	NaN	NaN	0.238	NaN	0.289	NaN	NaN	0.149	NaN	NaN	NaN	0.322	NaN	0.752	0.43
Marin	NaN	NaN	NaN	NaN	NaN	NaN	NaN	NaN	NaN	0.124	0	NaN	NaN	NaN	NaN	0.125	NaN	NaN	0.25	0.125	0.125
Merced	NaN	NaN	NaN	NaN	0.197	0.336	0.066	NaN	0.273	0.526	0.471	0.303	0.359	0.599	0.461	0.34	0.556	0.71	1.142	1.019	0.556
Monterey	NaN	NaN	NaN	NaN	NaN	NaN	NaN	0.324	0.287	0.429	0.362	0.295	0.377	0.467	0.48	0.768	0.672	0.883	0.595	0.595	0.845
Napa	NaN	NaN	NaN	NaN	NaN	NaN	NaN	NaN	NaN	NaN	NaN	NaN	NaN	NaN	NaN	NaN	NaN	NaN	NaN	0.372	0.992
Orange	0.195	0.153	0.263	0.259	0.338	0.359	0.382	0.355	0.371	0.387	0.426	0.491	0.576	0.52	0.608	0.681	0.736	0.603	0.592	0.548	0.421
Placer	NaN	NaN	NaN	0	NaN	NaN	NaN	NaN	NaN	NaN	NaN	NaN	NaN	NaN	NaN	NaN	NaN	NaN	NaN	NaN	NaN
Riverside	0.12	0.161	0.196	0.199	0.291	0.223	0.327	0.377	0.378	0.355	0.42	0.49	0.438	0.505	0.487	0.584	0.513	0.641	0.645	0.768	0.655
Sacramento	0.202	0.287	0.25	0.209	0.22	0.496	0.324	0.364	0.439	0.454	0.503	0.382	0.531	0.59	0.814	0.691	0.843	0.809	0.994	1.247	1.146
San Bernardino	0.098	0.107	0.208	0.314	0.321	0.312	0.383	0.423	0.4	0.517	0.585	0.577	0.559	0.56	0.615	0.685	0.746	0.777	0.716	0.741	0.721
San Diego	0.141	0.22	0.194	0.245	0.319	0.315	0.396	0.491	0.465	0.557	0.552	0.694	0.741	0.648	0.793	0.914	0.869	1.159	1.142	1.32	1.46
San Francisco	0	0	NaN	NaN	NaN	NaN	NaN	NaN	NaN	NaN	NaN	NaN	NaN	NaN	NaN	NaN	NaN	NaN	NaN	NaN	NaN
San Joaquin	NaN	NaN	NaN	0.227	0.247	0.43	0.388	0.195	0.586	0.356	0.553	0.427	0.658	0.676	0.589	0.78	1.04	1.398	1.219	1.625	1.528
San Luis Obispo	NaN	NaN	NaN	NaN	NaN	NaN	NaN	NaN	NaN	0.481	0.583	0.452	0.649	0.53	0.629	0.76	0.38	0.38	1.235	0.95	0.76
San Mateo	NaN	0	NaN	NaN	NaN	NaN	NaN	NaN	NaN	NaN	NaN	NaN	NaN	NaN	NaN	NaN	NaN	NaN	NaN	NaN	NaN
Santa Barbara	NaN	NaN	NaN	NaN	NaN	NaN	NaN	NaN	NaN	0.466	0.523	0.676	0.672	0.538	0.634	0.683	0.762	0.893	1.024	0.972	1.182
Santa Clara	NaN	0.201	0.174	0.28	0.354	0.323	0.341	0.462	0.378	0.426	0.511	0.304	0.458	0.534	0.646	0.554	0.726	0.739	0.739	0.805	1.003
Santa Cruz	NaN	NaN	NaN	NaN	NaN	NaN	NaN	NaN	NaN	NaN	NaN	NaN	NaN	NaN	NaN	0.743	NaN	NaN	0.743	NaN	NaN
Shasta	0	0	NaN	NaN	NaN	NaN	0	0	NaN	NaN	NaN	NaN	NaN	NaN	0	NaN	NaN	NaN	NaN	0	NaN
Solano	0	NaN	NaN	NaN	NaN	NaN	NaN	NaN	0.604	NaN	NaN	NaN	NaN	NaN	NaN	NaN	NaN	NaN	NaN	0.702	0.602
Sonoma	NaN	NaN	NaN	NaN	NaN	NaN	NaN	NaN	NaN	0.529	0.471	NaN	NaN	NaN	NaN	0.446	NaN	NaN	0.527	0.568	0.568
Stanislaus	NaN	NaN	NaN	NaN	0.308	0.344	0.312	NaN	0.523	0.653	0.367	0.566	0.75	0.726	0.568	0.556	0.536	0.613	0.977	1.015	1.494
Sutter	0	0	NaN	NaN	NaN	NaN	NaN	NaN	NaN	0	NaN	NaN	NaN	NaN	NaN	NaN	NaN	NaN	NaN	NaN	NaN
Tulare	NaN	NaN	NaN	NaN	NaN	NaN	0.269	NaN	0.212	0.397	0.333	0.358	0.459	0.471	0.569	0.42	0.591	0.637	0.669	0.917	0.855
Ventura	NaN	0.208	NaN	0.194	NaN	0.277	0.25	0.37	0.341	0.393	0.51	0.592	0.364	0.429	0.653	0.639	0.639	1.007	0.687	1.039	1.246
Yolo	0	NaN	NaN	NaN	NaN	NaN	NaN	NaN	NaN	NaN	NaN	NaN	NaN	NaN	NaN	NaN	0.992	1.172	1.263	1.172	1.353
Alameda/Santa Clara	0.12	0.225	0.215	0.334	0.353	0.331	0.37	0.432	0.447	0.384	0.477	0.492	0.527	0.642	0.689	0.744	0.871	0.863	0.953	1.042	1.049
Sierra Foothills	NaN	NaN	NaN	NaN	NaN	NaN	NaN	NaN	NaN	NaN	NaN	0.427	0.649	0.613	0.689	0.494	0.635	0.847	1.023	0.564	0.706		Butte, El Dorado, Placer and Sutter
South Central Valley	0.148	0.126	0.203	0.193	0.206	0.262	0.283	0.295	0.373	0.315	0.445	0.435	0.463	0.468	0.573	0.607	0.548	0.667	0.828	0.944	0.944		Fresno, Kern, Kings, Madera and Tulare
Los Angeles/Ventura	0.424	0.363	0.457	0.447	0.584	0.605	0.649	0.779	0.839	0.817	0.979	1.157	1.071	1.14	1.268	1.357	1.431	1.52	1.509	1.494	1.6
N San Joaquin Valley	0.109	0.172	0.142	0.193	0.257	0.378	0.286	0.242	0.49	0.501	0.467	0.446	0.624	0.677	0.552	0.602	0.753	0.965	1.115	1.273	1.3		Merced, San Joaquin and Stanislaus
Monterey to SF coast	NaN	NaN	0.138	0.168	0.191	0.133	0.261	0.301	0.283	0.294	0.242	0.279	0.296	0.41	0.491	0.622	0.501	0.557	0.557	0.501	0.65		Monterey, Santa Cruz, San Mateo and San Francisco
Delta Northeast	NaN	NaN	NaN	NaN	NaN	NaN	0.292	0.37	0.537	0.359	0.417	0.701	0.391	0.399	0.446	0.435	0.588	0.588	0.691	0.767	0.895		Napa, Solano and Yolo
San Diego/Imperial	0.14	0.224	0.188	0.25	0.328	0.307	0.38	0.498	0.472	0.529	0.577	0.701	0.761	0.695	0.894	1.065	1.041	1.313	1.386	1.488	1.6
South Central Coast	NaN	NaN	0.26	NaN	0.253	NaN	0.268	NaN	NaN	0.469	0.537	0.625	0.667	0.537	0.633	0.699	0.679	0.782	1.07	0.967	1.09		Santa Barbara and San Luis Obispo
Sonoma/Marin	NaN	NaN	NaN	NaN	NaN	NaN	NaN	NaN	NaN	0.429	0.351	0.339	NaN	NaN	0.352	0.367	NaN	0.337	0.459	0.459	0.459

## Sheet: Asians
County\Birth Year	1993	1994	1995	1996	1997	1998	1999	2000	2001	2002	2003	2004	2005	2006	2007	2008	2009	2010	2011	2012	2013		Estimated CDDS/NCES ASD prevalence in 2019 in % as a function of county and birth year
Alameda	0.419	0.323	0.521	0.612	0.564	0.414	0.829	0.724	0.682	1.028	0.86	0.793	0.927	1.025	0.871	0.967	1.164	1.271	1.378	1.432	1.593
Butte	0	0	0	NaN	NaN	NaN	NaN	0	NaN	NaN	NaN	0	NaN	0	NaN	0	NaN	NaN	NaN	NaN	NaN
Contra Costa	NaN	NaN	NaN	0.483	0.438	0.529	NaN	0.545	0.713	0.511	0.767	0.765	0.636	0.612	0.599	0.566	1.091	1.132	1.213	0.889	0.93
El Dorado	0	0	0	0	NaN	NaN	0	0	NaN	NaN	NaN	0	0	NaN	NaN	NaN	NaN	NaN	NaN	NaN	NaN
Fresno	NaN	NaN	NaN	NaN	NaN	NaN	NaN	NaN	NaN	NaN	NaN	NaN	NaN	NaN	NaN	NaN	1.128	0.863	0.929	1.593	1.46
Humboldt	0	0	0	0	0	0	NaN	NaN	0	NaN	NaN	0	NaN	NaN	0	0	0	0	0	NaN	NaN
Imperial	0	0	NaN	0	0	0	0	0	0	0	0	0	NaN	0	0	0	NaN	0	NaN	0	0
Kern	NaN	NaN	NaN	NaN	NaN	0	NaN	NaN	NaN	NaN	NaN	NaN	NaN	NaN	NaN	NaN	2.043	NaN	NaN	NaN	NaN
Kings	0	0	0	NaN	0	0	NaN	NaN	NaN	0	0	NaN	0	0	0	NaN	0	NaN	NaN	NaN	0
Los Angeles	0.489	0.579	0.569	0.631	0.716	0.953	0.825	1.234	1.203	1.177	1.245	1.238	1.219	1.211	1.463	1.496	1.531	1.823	1.814	1.938	2.292
Madera	NaN	NaN	NaN	NaN	NaN	NaN	NaN	NaN	NaN	NaN	NaN	NaN	NaN	NaN	NaN	NaN	NaN	NaN	NaN	NaN	NaN
Marin	NaN	NaN	NaN	NaN	NaN	NaN	NaN	NaN	NaN	NaN	NaN	NaN	NaN	NaN	NaN	NaN	NaN	NaN	NaN	NaN	NaN
Merced	NaN	0	NaN	NaN	0	NaN	NaN	NaN	NaN	NaN	NaN	NaN	NaN	NaN	0	NaN	NaN	NaN	NaN	NaN	NaN
Monterey	NaN	NaN	NaN	NaN	NaN	NaN	0	NaN	NaN	0	NaN	NaN	NaN	NaN	NaN	0	NaN	0	NaN	NaN	NaN
Napa	NaN	NaN	NaN	NaN	NaN	NaN	NaN	NaN	NaN	NaN	NaN	NaN	NaN	NaN	NaN	NaN	NaN	NaN	NaN	NaN	NaN
Orange	0.274	0.34	0.64	0.491	0.501	0.596	0.757	0.509	0.633	0.68	0.759	0.768	0.829	0.912	0.97	1.004	1.089	0.933	0.905	1.315	1.089
Placer	0	0	NaN	NaN	NaN	NaN	NaN	NaN	NaN	NaN	NaN	NaN	NaN	NaN	NaN	NaN	2.358	2.358	2.358	NaN	2.751
Riverside	NaN	NaN	0.454	0.465	0.538	NaN	0.927	0.587	0.703	NaN	0.648	0.718	0.741	0.589	NaN	0.91	0.683	NaN	1.365	1.081	0.967
Sacramento	NaN	NaN	0.317	0.366	0.367	0.618	0.754	0.751	0.74	0.647	0.848	0.845	1.11	0.637	1.084	0.717	1.159	1.076	1.628	1.683	1.738
San Bernardino	NaN	NaN	NaN	0.601	NaN	0.645	NaN	0.831	0.831	NaN	0.974	0.807	NaN	1.266	1.417	NaN	1.001	1.314	1.189	1.064	1.064
San Diego	0.455	0.392	0.442	0.587	0.494	0.666	0.778	0.821	0.731	0.757	0.85	0.987	0.943	0.949	1.226	1.373	1.322	1.704	1.831	2.11	2.619
San Francisco	NaN	NaN	NaN	0.469	0.417	0.483	0.794	NaN	0.848	0.747	0.637	0.617	0.934	0.757	NaN	NaN	0.685	0.872	0.934	1.495	1.121
San Joaquin	NaN	NaN	NaN	NaN	0.779	NaN	NaN	NaN	0.576	NaN	NaN	NaN	0.839	0.895	1.207	0.927	0.872	1.308	1.472	2.344	2.943
San Luis Obispo	0	0	0	0	0	0	NaN	0	NaN	0	NaN	0	0	0	NaN	NaN	0	0	0	NaN	0
San Mateo	NaN	NaN	NaN	NaN	NaN	0.8	NaN	0.8	0.851	1.007	0.81	0.912	NaN	NaN	0.634	NaN	NaN	1.114	1.282	0.724	0.724
Santa Barbara	0	0	NaN	0	NaN	NaN	NaN	NaN	NaN	0	NaN	0	NaN	NaN	NaN	NaN	NaN	NaN	NaN	NaN	NaN
Santa Clara	0.462	0.3	0.576	0.646	0.761	0.75	0.742	0.898	1.188	1.172	1.029	1.156	0.724	0.927	1.019	1.025	0.985	1.169	0.985	1.143	0.906
Santa Cruz	NaN	0	NaN	0	0	0	0	NaN	NaN	0	NaN	0	0	NaN	0	0	NaN	NaN	0	0	NaN
Shasta	0	NaN	0	NaN	0	0	0	NaN	0	NaN	NaN	NaN	0	0	NaN	0	0	NaN	0	NaN	NaN
Solano	NaN	NaN	NaN	NaN	NaN	NaN	NaN	NaN	NaN	NaN	NaN	NaN	NaN	NaN	NaN	NaN	NaN	NaN	NaN	2.119	NaN
Sonoma	NaN	0	NaN	0	0	NaN	0	NaN	NaN	NaN	0	NaN	NaN	0	NaN	0	0	NaN	NaN	NaN	NaN
Stanislaus	0	NaN	0	NaN	NaN	NaN	NaN	NaN	NaN	NaN	0	NaN	NaN	NaN	NaN	NaN	NaN	NaN	NaN	2.045	2.045
Sutter	0	0	0	0	0	0	0	NaN	0	0	0	0	NaN	0	0	0	NaN	NaN	NaN	0	NaN
Tulare	NaN	0	NaN	NaN	0	0	NaN	NaN	NaN	0	NaN	0	NaN	NaN	0	NaN	NaN	0	NaN	NaN	NaN
Ventura	NaN	NaN	NaN	NaN	NaN	NaN	NaN	NaN	NaN	1.211	NaN	NaN	NaN	NaN	NaN	NaN	NaN	1.624	NaN	NaN	1.772
Yolo	NaN	NaN	NaN	NaN	NaN	NaN	NaN	NaN	0	NaN	NaN	NaN	NaN	NaN	NaN	NaN	NaN	NaN	NaN	NaN	NaN
Alameda/Santa Clara	0.443	0.31	0.552	0.631	0.675	0.605	0.78	0.825	0.97	1.111	0.958	1.003	0.812	0.97	0.953	1	1.061	1.212	1.152	1.265	1.197
Sierra Foothills	NaN	NaN	NaN	NaN	NaN	NaN	NaN	NaN	NaN	NaN	NaN	NaN	NaN	NaN	1.303	NaN	1.559	1.462	1.462	1.462	1.852		Butte, El Dorado, Placer and Sutter
South Central Valley	NaN	NaN	NaN	NaN	NaN	NaN	0.462	0.429	NaN	0.485	NaN	0.739	0.516	0.634	NaN	0.637	1.275	0.977	1.105	1.36	1.487		Fresno, Kern, Kings, Madera and Tulare
Los Angeles/Ventura	0.478	0.552	0.54	0.625	0.718	0.943	0.785	1.216	1.162	1.179	1.188	1.208	1.197	1.201	1.416	1.453	1.486	1.812	1.795	1.854	2.263
N San Joaquin Valley	NaN	NaN	0.361	NaN	0.593	0.432	0.57	0.397	0.595	0.594	NaN	0.5	0.704	0.786	0.94	0.798	0.798	1.33	1.254	2.241	2.659		Merced, San Joaquin and Stanislaus
Monterey to SF coast	0.231	0.415	0.318	0.483	0.513	0.618	0.634	0.655	0.856	0.802	0.764	0.825	0.598	0.681	0.52	0.379	0.704	0.948	1.138	1.083	0.921		Monterey, Santa Cruz, San Mateo and San Francisco
Delta Northeast	NaN	NaN	NaN	NaN	NaN	NaN	NaN	NaN	NaN	0.902	1.182	NaN	NaN	NaN	NaN	NaN	1.14	NaN	1.045	2.185	1.14		Napa, Solano and Yolo
San Diego/Imperial	0.455	0.391	0.461	0.586	0.489	0.661	0.773	0.817	0.727	0.756	0.847	0.983	0.962	0.943	1.221	1.367	1.341	1.696	1.847	2.1	2.607
South Central Coast	NaN	NaN	NaN	NaN	NaN	NaN	NaN	NaN	NaN	NaN	NaN	NaN	NaN	NaN	NaN	NaN	NaN	NaN	NaN	NaN	NaN		Santa Barbara and San Luis Obispo
Sonoma/Marin	NaN	NaN	NaN	NaN	NaN	NaN	NaN	NaN	NaN	NaN	NaN	NaN	NaN	NaN	NaN	NaN	NaN	NaN	NaN	NaN	NaN
