# Supplementary material for: California Autism Prevalence by County and Race/Ethnicity: Declining Trends Among Wealthy Whites
Source: J Autism Dev Disord. 2020 Mar 19;50(11):4011–21. doi: 10.1007/s10803-020-04460-0 (PMC7557477; doi:10.1007/s10803-020-04460-0)
Supplement: Supplementary file 3 — Supplementary file3 (XLSX 37 kb) [file 10803_2020_4460_MOESM3_ESM.xlsx]

## Sheet: All Races
County\Birth Year	1993	1994	1995	1996	1997	1998	1999	2000	2001	2002	2003	2004	2005	2006	2007	2008	2009	2010	2011	2012	2013		Projected NCES population in 2019 as a function of county and birth year
Alameda	15079	16060	16257	16141	16956	16414	16666	17223	16994	17110	17444	17117	17303	17576	17262	17105	17105	17105	17105	17105	17105
Butte	2960	2803	2834	2708	2502	2499	2421	2405	2527	2358	2492	2384	2335	2515	2444	2334	2334	2334	2334	2334	2334
Contra Costa	13614	14443	13705	14239	13887	13709	14104	14329	14252	14281	14369	14198	13826	14180	13791	13410	13410	13410	13410	13410	13410
El Dorado	2686	2996	2584	2523	2412	2400	2289	2187	2153	2178	2309	2390	2407	2471	2483	2323	2323	2323	2323	2323	2323
Fresno	14951	15832	14973	15013	14692	14719	14375	14272	14675	14976	15382	15234	15541	15743	15485	15630	15630	15630	15630	15630	15630
Humboldt	1367	1353	1277	1242	1245	1339	1282	1227	1419	1234	1367	1341	1516	1501	1413	1472	1472	1472	1472	1472	1472
Imperial	3214	3477	3000	2991	3113	3072	3211	3113	3339	3154	3262	2879	3126	2960	2787	2816	2816	2816	2816	2816	2816
Kern	13330	15039	12843	13730	12934	13494	13393	13559	13912	13617	13811	13826	14399	14757	14030	15123	15123	15123	15123	15123	15123
Kings	1956	2076	2050	1967	1934	1819	1892	1891	2057	2069	2135	1999	2216	2156	2125	2201	2201	2201	2201	2201	2201
Los Angeles	106050	127253	113580	118306	118919	120459	117351	117993	116910	116219	115623	109400	110230	111991	110636	109979	109979	109979	109979	109979	109979
Madera	2485	2502	2411	2416	2392	2308	2341	2261	2327	2400	2383	2425	2407	2633	2404	2517	2517	2517	2517	2517	2517
Marin	2042	2267	2256	2244	2233	2343	2373	2504	2622	2672	2686	2702	2545	2653	2592	2574	2574	2574	2574	2574	2574
Merced	5074	4798	4556	4414	4372	4295	4291	4326	4548	4466	4608	4432	4515	4673	4598	4337	4337	4337	4337	4337	4337
Monterey	4153	4185	4481	4485	4680	4771	5036	5172	5355	5491	5650	5875	6209	6493	6464	6315	6315	6315	6315	6315	6315
Napa	1833	1897	1848	1767	1823	1909	1821	1734	1710	1690	1712	1575	1626	1679	1464	1432	1432	1432	1432	1432	1432
Orange	41014	44036	41737	43285	43021	41666	42337	42208	41329	39774	39647	38223	38020	37566	36098	36257	36257	36257	36257	36257	36257
Placer	6270	6004	6341	6090	5843	5700	5779	5579	5602	5615	5645	5871	5737	5355	5380	5142	5142	5142	5142	5142	5142
Riverside	41978	44387	40441	38016	36092	36015	34605	34918	34351	33936	34451	33917	34338	35085	33616	32671	32671	32671	32671	32671	32671
Sacramento	21985	17031	19085	18205	20419	17894	18425	18577	18179	18421	18543	18687	18885	19729	19162	18709	18709	18709	18709	18709	18709
San Bernardino	37008	36446	35722	34544	33177	32448	31608	31137	31280	31420	31354	30229	31336	32109	30858	30372	30372	30372	30372	30372	30372
San Diego	43474	39340	43355	41628	41575	41060	40311	40028	39140	38213	38559	37642	38335	39047	37978	36933	36933	36933	36933	36933	36933
San Francisco	4360	5373	4612	5080	5029	5214	5282	5188	4529	4323	5631	3876	3923	3976	4321	4331	4331	4331	4331	4331	4331
San Joaquin	11317	11020	10932	11011	10650	11085	10949	11299	11228	11353	11267	11488	11899	12212	11603	11278	11278	11278	11278	11278	11278
San Luis Obispo	3234	3241	3294	3103	3188	3012	2895	2956	2837	2692	2757	2757	2723	2638	2685	2516	2516	2516	2516	2516	2516
San Mateo	6277	6255	6901	7285	7016	6896	7063	7331	6934	6970	7279	7072	6972	7254	6976	7062	7062	7062	7062	7062	7062
Santa Barbara	5159	4983	5032	4986	4937	5232	5092	5250	4997	4950	5101	5266	5416	5523	5332	5409	5409	5409	5409	5409	5409
Santa Clara	19122	18777	20177	20052	20366	20317	20347	20927	20499	20818	21355	20821	20726	20845	20484	20581	20581	20581	20581	20581	20581
Santa Cruz	2898	2727	3315	3196	3336	3218	3127	3138	3137	3209	3214	3208	2983	3199	3027	2957	2957	2957	2957	2957	2957
Shasta	2725	2732	2406	2485	2294	2321	2280	2110	2234	2096	2142	1855	1902	2049	1984	2031	2031	2031	2031	2031	2031
Solano	4798	5576	5040	4797	4749	4840	4774	4969	4961	5026	5102	4926	4979	5076	5013	4795	4795	4795	4795	4795	4795
Sonoma	5372	5436	5186	5248	5217	5194	5219	5202	5265	5294	5289	5388	5273	5351	5018	5041	5041	5041	5041	5041	5041
Stanislaus	8574	8493	8393	8369	8189	8150	8354	8259	8138	8138	8508	8216	8785	8873	8724	8609	8609	8609	8609	8609	8609
Sutter	1901	1856	1891	1796	1720	1565	1647	1618	1707	1664	1711	1710	1913	1868	1843	1918	1918	1918	1918	1918	1918
Tulare	6577	6994	6778	6991	7110	7109	7078	7433	7565	7530	7881	8049	8246	8203	8071	7978	7978	7978	7978	7978	7978
Ventura	12890	13340	13925	13952	13823	13984	13489	13246	12747	12542	12395	12102	11781	11983	11145	10555	10555	10555	10555	10555	10555
Yolo	2314	2875	2498	2386	2443	2356	2344	2405	2378	2365	2484	2393	2448	2552	2350	2389	2389	2389	2389	2389	2389

## Sheet: Whites
County\Birth Year	1993	1994	1995	1996	1997	1998	1999	2000	2001	2002	2003	2004	2005	2006	2007	2008	2009	2010	2011	2012	2013		Projected NCES population in 2019 as a function of county and birth year
Alameda	3581	3452	3646	3651	3536	3462	3495	3387	3297	3250	3227	3059	3057	3027	2951	2824	2824	2824	2824	2824	2824
Butte	1845	1693	1719	1612	1451	1435	1452	1438	1508	1382	1505	1373	1357	1409	1412	1313	1313	1313	1313	1313	1313
Contra Costa	4811	4936	4986	4935	5039	4665	4876	4682	4669	4663	4623	4535	4217	4231	4028	3758	3758	3758	3758	3758	3758
El Dorado	1975	2222	1945	1877	1728	1508	1615	1508	1449	1486	1546	1572	1560	1587	1609	1473	1473	1473	1473	1473	1473
Fresno	3112	3018	3007	3051	2900	2870	2874	2747	2614	2696	2655	2648	2686	2550	2551	2586	2586	2586	2586	2586	2586
Humboldt	873	823	821	661	722	771	777	746	857	707	852	780	854	873	792	792	792	792	792	792	792
Imperial	193	169	172	145	143	173	169	137	150	158	161	129	136	132	118	114	114	114	114	114	114
Kern	3146	3636	2738	2982	2880	2970	3084	2768	2924	2853	2890	2964	3210	3145	3231	3333	3333	3333	3333	3333	3333
Kings	552	469	526	500	415	417	419	381	379	397	410	369	390	392	369	366	366	366	366	366	366
Los Angeles	18210	18434	17652	17713	17497	16948	16643	16610	15861	15412	16053	15441	15334	15413	15829	15438	15438	15438	15438	15438	15438
Madera	701	645	566	610	579	559	566	517	540	564	532	427	466	469	449	507	507	507	507	507	507
Marin	1130	1143	1263	1249	1234	1269	1353	1416	1471	1517	1511	1580	1463	1571	1487	1519	1519	1519	1519	1519	1519
Merced	1020	941	793	767	742	771	764	708	718	710	720	659	699	636	656	615	615	615	615	615	615
Monterey	484	462	553	576	710	665	725	730	768	663	818	697	758	680	745	709	709	709	709	709	709
Napa	560	576	540	511	538	571	542	508	501	523	498	467	473	486	412	400	400	400	400	400	400
Orange	14330	14090	13454	13120	13397	13172	12774	12657	11862	11386	10870	10317	9826	9511	8921	8751	8751	8751	8751	8751	8751
Placer	4184	3835	4115	3952	3738	3666	3661	3607	3557	3612	3514	3636	3415	3266	3214	3064	3064	3064	3064	3064	3064
Riverside	9762	10178	9011	8809	8162	8207	7708	7709	7570	7370	7254	7182	6849	6927	6613	6400	6400	6400	6400	6400	6400
Sacramento	6612	5390	5907	5537	6263	5688	5920	5853	5766	5829	5786	5821	5694	5924	5720	5490	5490	5490	5490	5490	5490
San Bernardino	6890	6548	6767	6679	6260	6050	6058	5511	5307	5295	4951	4657	4539	4492	4119	3936	3936	3936	3936	3936	3936
San Diego	12791	11779	12724	12477	12194	11796	11874	11645	11349	11008	11154	11297	11565	11579	11233	10881	10881	10881	10881	10881	10881
San Francisco	291	333	312	390	417	468	463	424	402	439	617	454	460	527	681	714	714	714	714	714	714
San Joaquin	2383	2197	2384	2384	2258	2357	2322	2344	2177	2173	2234	2144	2062	2026	1993	1881	1881	1881	1881	1881	1881
San Luis Obispo	1883	1937	1910	1694	1749	1671	1561	1587	1522	1419	1482	1439	1425	1309	1385	1242	1242	1242	1242	1242	1242
San Mateo	1572	1337	1479	1479	1521	1515	1645	1927	1794	1924	2009	2174	1936	2002	1971	2041	2041	2041	2041	2041	2041
Santa Barbara	1475	1374	1414	1229	1308	1355	1355	1417	1257	1203	1285	1240	1186	1254	1184	1249	1249	1249	1249	1249	1249
Santa Clara	3758	3980	4456	4341	4312	4373	4322	4269	4446	4164	4425	4267	4034	4078	3973	3763	3763	3763	3763	3763	3763
Santa Cruz	1355	1289	1456	1316	1283	1242	1270	1248	1224	1259	1213	1285	1101	1272	1127	1062	1062	1062	1062	1062	1062
Shasta	2082	2053	1726	1698	1554	1579	1573	1502	1505	1439	1450	1234	1249	1368	1311	1343	1343	1343	1343	1343	1343
Solano	1196	1142	1269	1154	1216	1283	1284	1388	1298	1299	1281	1261	1229	1237	1170	1110	1110	1110	1110	1110	1110
Sonoma	2515	2583	2556	2443	2404	2370	2314	2295	2291	2301	2291	2236	2244	2228	2168	1987	1987	1987	1987	1987	1987
Stanislaus	2570	2581	2444	2404	2341	2291	2430	2323	2145	2052	2221	2193	2250	2073	2241	2151	2151	2151	2151	2151	2151
Sutter	747	756	774	796	703	622	639	597	651	616	657	616	745	694	715	743	743	743	743	743	743
Tulare	1548	1484	1419	1412	1535	1413	1373	1344	1347	1223	1344	1165	1210	1091	1163	1025	1025	1025	1025	1025	1025
Ventura	5268	5478	5679	5540	5363	5353	4858	4699	4326	4333	3990	3852	3540	3372	3122	2902	2902	2902	2902	2902	2902
Yolo	889	1065	963	914	891	871	904	861	808	797	858	827	786	843	787	802	802	802	802	802	802

## Sheet: Blacks
County\Birth Year	1993	1994	1995	1996	1997	1998	1999	2000	2001	2002	2003	2004	2005	2006	2007	2008	2009	2010	2011	2012	2013		Projected NCES population in 2019 as a function of county and birth year
Alameda	1597	2043	1949	1823	1938	1780	1835	1788	1814	1653	1633	1602	1515	1638	1552	1658	1658	1658	1658	1658	1658
Butte	83	106	41	64	55	35	58	62	47	55	68	40	46	51	54	37	37	37	37	37	37
Contra Costa	1611	1480	1506	1702	1392	1472	1561	1517	1447	1468	1354	1380	1121	1267	1120	1104	1104	1104	1104	1104	1104
El Dorado	33	23	40	47	36	24	34	21	22	15	21	31	17	24	34	20	20	20	20	20	20
Fresno	830	972	843	806	840	764	746	694	693	718	766	650	705	725	731	723	723	723	723	723	723
Humboldt	14	-4	10	-3	14	19	10	6	15	11	18	18	19	13	18	16	16	16	16	16	16
Imperial	37	31	21	9	11	21	11	12	31	15	20	14	20	17	23	26	26	26	26	26	26
Kern	774	869	612	744	740	692	760	643	727	746	725	728	788	722	745	780	780	780	780	780	780
Kings	44	55	84	93	100	73	91	83	81	74	75	84	88	71	62	81	81	81	81	81	81
Los Angeles	9366	11710	9273	10250	9145	9634	8888	8710	8367	8547	8282	8106	7767	7914	8048	8199	8199	8199	8199	8199	8199
Madera	72	74	71	87	39	55	50	42	43	32	31	35	39	34	39	52	52	52	52	52	52
Marin	96	51	76	83	75	73	51	64	51	52	41	50	38	41	43	38	38	38	38	38	38
Merced	200	158	142	170	109	125	111	96	134	149	126	131	116	122	122	127	127	127	127	127	127
Monterey	78	82	95	69	74	57	61	83	64	70	64	73	45	44	78	45	45	45	45	45	45
Napa	46	53	55	64	62	74	79	67	50	47	48	37	40	43	22	24	24	24	24	24	24
Orange	747	879	722	843	689	750	692	679	595	619	585	500	498	513	458	472	472	472	472	472	472
Placer	130	148	137	169	144	111	145	129	140	121	139	121	146	102	112	91	91	91	91	91	91
Riverside	3653	3529	3448	2946	2826	2733	2628	2487	2329	2196	2209	2030	2051	2131	1989	1911	1911	1911	1911	1911	1911
Sacramento	3298	2385	2568	2326	2944	2417	2469	2331	2285	2099	2237	2192	2157	2139	2228	2050	2050	2050	2050	2050	2050
San Bernardino	3782	3689	3362	3249	2922	3003	2794	2762	2710	2749	2490	2404	2371	2417	2292	2261	2261	2261	2261	2261	2261
San Diego	2486	1941	2472	2336	2104	1967	1931	1830	1530	1496	1564	1583	1566	1584	1704	1604	1604	1604	1604	1604	1604
San Francisco	340	546	348	444	487	559	639	392	352	375	839	331	329	319	378	309	309	309	309	309	309
San Joaquin	1218	1225	1026	1102	1031	1030	959	944	923	922	854	959	955	901	832	834	834	834	834	834	834
San Luis Obispo	44	49	50	40	42	33	29	29	25	24	40	22	25	15	24	24	24	24	24	24	24
San Mateo	174	209	150	131	214	119	135	99	98	71	156	107	107	106	93	80	80	80	80	80	80
Santa Barbara	43	45	34	43	35	54	72	84	57	51	66	43	48	51	55	41	41	41	41	41	41
Santa Clara	567	531	532	488	511	473	469	435	441	406	384	378	363	350	335	346	346	346	346	346	346
Santa Cruz	29	37	33	42	21	25	16	22	23	34	22	25	32	30	17	40	40	40	40	40	40
Shasta	20	19	5	40	39	44	39	39	37	31	19	14	25	17	30	30	30	30	30	30	30
Solano	776	1043	767	808	678	727	717	727	739	732	746	673	693	743	681	634	634	634	634	634	634
Sonoma	136	116	106	84	128	59	77	80	88	61	84	72	56	78	65	65	65	65	65	65	65
Stanislaus	327	307	280	240	273	260	214	240	213	234	200	222	236	234	240	233	233	233	233	233	233
Sutter	72	33	34	24	38	33	26	29	34	29	19	32	40	29	31	39	39	39	39	39	39
Tulare	146	120	130	127	113	126	114	93	92	101	85	78	84	83	80	86	86	86	86	86	86
Ventura	331	511	496	459	515	482	509	450	392	379	292	334	284	280	202	228	228	228	228	228	228
Yolo	98	100	94	79	67	52	64	57	77	73	74	78	78	54	90	67	67	67	67	67	67

## Sheet: Hispanics
County\Birth Year	1993	1994	1995	1996	1997	1998	1999	2000	2001	2002	2003	2004	2005	2006	2007	2008	2009	2010	2011	2012	2013		Projected NCES population in 2019 as a function of county and birth year
Alameda	3908	4208	4626	4478	5405	5521	5569	5860	5925	6084	6012	5654	5985	6115	5907	5858	5858	5858	5858	5858	5858
Butte	575	461	584	595	614	617	569	561	622	592	564	601	559	631	598	585	585	585	585	585	585
Contra Costa	3871	4423	4099	4627	4449	4477	4669	4854	4911	4891	4935	4842	4959	5021	4948	4915	4915	4915	4915	4915	4915
El Dorado	352	433	372	405	420	477	380	442	452	416	447	485	517	543	518	535	535	535	535	535	535
Fresno	8369	9146	8733	9098	9058	9121	8916	8997	9427	9688	9973	10024	10186	10448	10253	10374	10374	10374	10374	10374	10374
Humboldt	152	168	161	155	202	201	192	197	258	236	237	247	277	317	298	302	302	302	302	302	302
Imperial	2914	3179	2747	2748	2788	2801	2988	2925	3098	2932	3005	2671	2907	2743	2589	2612	2612	2612	2612	2612	2612
Kern	8280	9366	8474	9085	8706	8893	8762	8903	9375	9212	9284	9261	9481	9971	9182	10020	10020	10020	10020	10020	10020
Kings	1158	1365	1233	1236	1278	1219	1257	1323	1480	1505	1528	1410	1594	1534	1569	1613	1613	1613	1613	1613	1613
Los Angeles	56081	74380	66207	73751	71375	76556	75281	75502	75751	76404	75088	70706	72020	73514	72047	71725	71725	71725	71725	71725	71725
Madera	1565	1597	1624	1602	1636	1577	1644	1598	1679	1718	1727	1859	1776	2008	1825	1861	1861	1861	1861	1861	1861
Marin	545	635	630	648	676	733	738	777	785	804	798	749	753	766	782	801	801	801	801	801	801
Merced	3299	3195	3033	3064	3049	2973	3050	3158	3303	3230	3399	3302	3340	3504	3468	3240	3240	3240	3240	3240	3240
Monterey	3163	3246	3411	3399	3616	3650	3863	4009	4183	4429	4425	4742	5040	5350	5213	5207	5207	5207	5207	5207	5207
Napa	821	886	919	846	961	1003	983	934	936	895	935	853	924	955	858	806	806	806	806	806	806
Orange	14384	16978	16722	18154	18919	18395	19368	19130	19390	18618	18297	17716	18060	18455	17754	18072	18072	18072	18072	18072	18072
Placer	968	997	1215	1185	1143	1114	1168	1014	1104	1112	1034	1053	1134	1024	1053	996	996	996	996	996	996
Riverside	24226	26060	24030	23594	22007	21988	21409	21744	21714	21393	21679	21409	22152	22777	21753	21227	21227	21227	21227	21227	21227
Sacramento	5950	4536	5600	5754	6363	5237	5552	5767	5470	5732	5569	5752	6029	6274	6140	5933	5933	5933	5933	5933	5933
San Bernardino	22508	22361	22579	22592	21472	21131	20622	20086	20233	20497	20353	19770	20559	21055	20148	19694	19694	19694	19694	19694	19694
San Diego	21330	19104	21171	21615	21002	20663	20179	20159	19798	19573	19194	18292	18500	18979	18543	17951	17951	17951	17951	17951	17951
San Francisco	787	1158	976	1103	1254	1575	1871	1399	1383	1329	2601	1113	1191	1226	1446	1324	1324	1324	1324	1324	1324
San Joaquin	5038	5008	4985	5286	5261	5354	5409	5637	5802	5891	5782	5861	6233	6653	6277	6153	6153	6153	6153	6153	6153
San Luis Obispo	1043	1032	1099	1127	1157	1129	1117	1141	1101	1040	1028	1107	1079	1132	1113	1053	1053	1053	1053	1053	1053
San Mateo	2114	2334	2657	2859	2848	2821	2952	2879	2665	2775	2807	2512	2626	2747	2535	2626	2626	2626	2626	2626	2626
Santa Barbara	2975	2905	3135	3210	3192	3403	3357	3436	3387	3435	3441	3696	3867	3900	3785	3808	3808	3808	3808	3808	3808
Santa Clara	6954	6456	7462	7498	7909	8056	8210	8014	7936	7972	8028	7560	7859	8049	7734	7579	7579	7579	7579	7579	7579
Santa Cruz	1228	1201	1621	1558	1710	1764	1655	1677	1675	1657	1736	1652	1609	1639	1612	1614	1614	1614	1614	1614	1614
Shasta	264	299	326	379	388	376	385	319	390	307	322	282	314	343	331	313	313	313	313	313	313
Solano	1332	1742	1449	1426	1479	1554	1731	1727	1821	1854	1952	1874	1976	2036	2070	1995	1995	1995	1995	1995	1995
Sonoma	2028	2066	1904	2127	2058	2184	2322	2330	2386	2459	2334	2495	2409	2504	2346	2466	2466	2466	2466	2466	2466
Stanislaus	4502	4557	4624	4596	4539	4645	4805	4836	4972	5051	5177	4947	5332	5648	5284	5220	5220	5220	5220	5220	5220
Sutter	584	597	651	617	581	595	643	639	658	683	646	671	717	737	734	719	719	719	719	719	719
Tulare	4287	4627	4610	4827	5085	5148	5196	5594	5651	5797	6005	6418	6530	6577	6327	6432	6432	6432	6432	6432	6432
Ventura	5766	5767	6265	6696	6531	6850	6791	6758	6749	6613	6661	6588	6596	7000	6583	6258	6258	6258	6258	6258	6258
Yolo	969	1209	1077	1003	1077	1104	1054	1126	1151	1155	1186	1122	1191	1274	1111	1109	1109	1109	1109	1109	1109

## Sheet: Asians
County\Birth Year	1993	1994	1995	1996	1997	1998	1999	2000	2001	2002	2003	2004	2005	2006	2007	2008	2009	2010	2011	2012	2013		Projected NCES population in 2019 as a function of county and birth year
Alameda	5250	5576	5373	5388	5324	5067	5065	5521	5282	5446	5582	5673	5612	5658	5629	5586	5586	5586	5586	5586	5586
Butte	270	305	296	243	224	208	189	178	174	153	159	162	139	173	147	166	166	166	166	166	166
Contra Costa	2313	2308	2327	2484	2511	2456	2559	2751	2666	2738	2737	2746	2672	2778	2673	2474	2474	2474	2474	2474	2474
El Dorado	155	136	181	142	107	118	141	90	121	108	138	139	148	153	150	120	120	120	120	120	120
Fresno	2154	2182	2005	2016	1705	1699	1636	1594	1657	1573	1638	1502	1602	1614	1530	1507	1507	1507	1507	1507	1507
Humboldt	77	86	72	75	80	57	58	69	48	64	61	74	72	71	62	76	76	76	76	76	76
Imperial	6	21	28	13	41	30	31	21	19	7	18	18	21	27	17	19	19	19	19	19	19
Kern	709	694	536	721	596	645	575	629	609	567	680	585	572	533	515	538	538	538	538	538	538
Kings	117	110	158	94	79	84	90	57	68	64	62	60	61	81	68	45	45	45	45	45	45
Los Angeles	18006	17798	16686	16315	15648	14589	14187	14421	13382	12659	12614	12275	11732	11396	11213	11298	11298	11298	11298	11298	11298
Madera	54	55	57	51	46	42	41	39	32	37	39	37	47	50	45	41	41	41	41	41	41
Marin	149	156	141	151	145	130	155	156	178	192	162	155	130	152	180	129	129	129	129	129	129
Merced	510	483	441	354	382	347	307	309	304	304	274	269	249	275	256	259	259	259	259	259	259
Monterey	312	302	301	332	251	241	260	252	230	227	228	228	209	214	224	188	188	188	188	188	188
Napa	165	177	193	198	183	224	196	190	172	175	177	150	138	155	127	148	148	148	148	148	148
Orange	9121	9414	8599	8765	8581	7892	8062	8641	8369	7943	8174	7686	7238	7452	7321	7071	7071	7071	7071	7071	7071
Placer	396	429	443	431	460	433	496	502	554	503	544	564	546	495	546	509	509	509	509	509	509
Riverside	2894	3035	2645	2364	2231	2223	2157	2214	1990	2058	2008	2089	2024	1868	1872	1758	1758	1758	1758	1758	1758
Sacramento	4446	3276	3469	3006	4084	3399	3450	3593	3513	3557	3657	3669	3692	3922	3599	3624	3624	3624	3624	3624	3624
San Bernardino	2311	2255	2162	1997	2077	1860	1738	1925	1926	1750	1745	1736	1766	1738	1694	1598	1598	1598	1598	1598	1598
San Diego	4830	4587	4747	4596	4458	4356	4240	4384	4105	3963	4235	4154	4242	4217	3996	3933	3933	3933	3933	3933	3933
San Francisco	2690	2938	2701	2769	2637	2485	2268	2241	2004	1740	1883	1782	1712	1584	1608	1606	1606	1606	1606	1606	1606
San Joaquin	2219	2073	2070	1908	1796	1882	1858	1958	1909	1944	1888	2025	2027	2011	1906	1835	1835	1835	1835	1835	1835
San Luis Obispo	135	79	93	96	118	110	88	100	105	104	99	83	89	80	57	87	87	87	87	87	87
San Mateo	2039	1978	1946	1549	1684	1750	1803	1999	1879	1788	1976	1974	1811	1877	1892	1795	1795	1795	1795	1795	1795
Santa Barbara	226	196	148	160	168	220	165	206	190	172	203	177	171	150	135	152	152	152	152	152	152
Santa Clara	6713	6665	6946	6967	6968	6665	6735	7569	6985	7425	7676	7788	7319	7226	7167	7612	7612	7612	7612	7612	7612
Santa Cruz	145	78	88	107	107	54	84	87	92	110	101	134	111	140	124	104	104	104	104	104	104
Shasta	99	91	106	92	57	89	82	78	112	104	101	97	87	87	75	93	93	93	93	93	93
Solano	844	953	772	805	635	799	713	738	744	751	739	732	679	678	661	613	613	613	613	613	613
Sonoma	301	309	247	289	253	266	223	240	253	224	246	242	270	242	180	203	203	203	203	203	203
Stanislaus	715	629	535	520	520	550	466	504	478	444	468	504	565	512	498	538	538	538	538	538	538
Sutter	309	293	308	248	245	245	245	263	262	240	290	247	270	249	231	231	231	231	231	231	231
Tulare	252	339	301	312	262	230	257	244	297	236	238	250	238	247	260	223	223	223	223	223	223
Ventura	1029	1056	1106	960	1070	995	966	959	905	908	933	888	886	840	723	677	677	677	677	677	677
Yolo	279	382	264	275	314	243	263	299	282	294	268	287	294	283	255	290	290	290	290	290	290
